# Supplementary material
Source: publisher figshare collection journal article supplement (https://gsajournals.figshare.com/ndownloader/files/17930528)
Supplement: Supplementary file 1 [file 17930528]

| **Table S5** Analyses of variance on behavioral responses of each selection group at multiple concentrations. | | | | | |
| --- | --- | --- | --- | --- | --- |
| **Odorant** | **Term** | **df** | **M.S.** | ***F*** | ***P*** |
| BUT | Selection | 2 | 1.9560 | 67.790 | **0.0001** |
|  | Concentration | 4 | 5.7900 | 200.6000 | **0.0001** |
|  | Interaction | 8 | 0.0861 | 2.9840 | **0.0032** |
| CYC | Selection | 2 | 1.2590 | 41.1000 | **0.0001** |
|  | Concentration | 4 | 6.8540 | 223.7000 | **0.0001** |
|  | Interaction | 8 | 0.4139 | 13.5100 | **0.0001** |
| Degrees of freedom (df), Sum of Squares (S.S.), *F* ratio (*F*), and *P*-value (*P*). | | | | | |
| Significant terms in bold. | | | | | |
